# Supplementary material
Source: publisher figshare collection journal article supplement (https://tandf.figshare.com/articles/dataset/_/9963524)

# checkCIF/PLATON report

Structure factors have been supplied for datablock(s) 1

THIS REPORT IS FOR GUIDANCE ONLY. IF USED AS PART OF A REVIEW PROCEDURE FOR PUBLICATION, IT SHOULD NOT REPLACE THE EXPERTISE OF AN EXPERIENCED CRYSTALLOGRAPHIC REFEREE.

No syntax errors found.      CIF dictionary      Interpreting this report

## Datablock: 1

---

Bond precision:    C-C = 0.0096 Å                      Wavelength=0.71073

Cell:                      a=18.770(6)              b=13.876(4)              c=19.169(6)  
                            alpha=90              beta=107.587(6)              gamma=90  
Temperature:              296 K

|                        | Calculated                         | Reported                  |
|------------------------|------------------------------------|---------------------------|
| Volume                 | 4759(3)                            | 4759(3)                   |
| Space group            | P 21/n                             | P 21/n                    |
| Hall group             | -P 2yn                             | -P 2yn                    |
| Moiety formula         | C48 H38 Cu N2 O P2, F6 P, C H2 Cl2 | ?                         |
| Sum formula            | C49 H40 Cl2 Cu F6 N2 O P3          | C49 H40 Cl2 Cu F6 N2 O P3 |
| Mr                     | 1014.19                            | 1014.18                   |
| Dx, g cm <sup>-3</sup> | 1.416                              | 1.415                     |
| Z                      | 4                                  | 4                         |
| Mu (mm <sup>-1</sup> ) | 0.734                              | 0.734                     |
| F000                   | 2072.0                             | 2072.0                    |
| F000'                  | 2076.57                            |                           |
| h,k,lmax               | 22,16,22                           | 22,16,22                  |
| Nref                   | 8412                               | 8403                      |
| Tmin,Tmax              | 0.753,0.802                        | 0.851,0.886               |
| Tmin'                  | 0.738                              |                           |

Correction method= # Reported T Limits: Tmin=0.851 Tmax=0.886  
AbsCorr = MULTI-SCAN

Data completeness= 0.999                      Theta(max)= 25.028

R(reflections)= 0.0654( 5451)              wR2(reflections)= 0.2000( 8403)

S = 1.030                      Npar= 596

---

The following ALERTS were generated. Each ALERT has the format

**test-name\_ALERT\_alert-type\_alert-level.**

Click on the hyperlinks for more details of the test.

---

**Alert level C**

|                   |                                                  |       |       |   |             |
|-------------------|--------------------------------------------------|-------|-------|---|-------------|
| PLAT230_ALERT_2_C | Hirshfeld Test Diff for                          | O1    | --C12 | . | 7.0 s.u.    |
| PLAT234_ALERT_4_C | Large Hirshfeld Difference                       | C27   | --C48 | . | 0.19 Ang.   |
| PLAT234_ALERT_4_C | Large Hirshfeld Difference                       | C29   | --C41 | . | 0.18 Ang.   |
| PLAT234_ALERT_4_C | Large Hirshfeld Difference                       | P3    | --F4  | . | 0.18 Ang.   |
| PLAT234_ALERT_4_C | Large Hirshfeld Difference                       | P3    | --F5  | . | 0.19 Ang.   |
| PLAT234_ALERT_4_C | Large Hirshfeld Difference                       | P3    | --F6  | . | 0.23 Ang.   |
| PLAT241_ALERT_2_C | High 'MainMol' Ueq as Compared to Neighbors of   | O1    |       |   | Check       |
| PLAT241_ALERT_2_C | High 'MainMol' Ueq as Compared to Neighbors of   | C23   |       |   | Check       |
| PLAT241_ALERT_2_C | High 'MainMol' Ueq as Compared to Neighbors of   | C39   |       |   | Check       |
| PLAT241_ALERT_2_C | High 'MainMol' Ueq as Compared to Neighbors of   | C44   |       |   | Check       |
| PLAT241_ALERT_2_C | High 'MainMol' Ueq as Compared to Neighbors of   | C45   |       |   | Check       |
| PLAT241_ALERT_2_C | High 'MainMol' Ueq as Compared to Neighbors of   | C48   |       |   | Check       |
| PLAT244_ALERT_4_C | Low 'Solvent' Ueq as Compared to Neighbors of    | C49   |       |   | Check       |
| PLAT260_ALERT_2_C | Large Average Ueq of Residue Including           | P3    |       |   | 0.223 Check |
| PLAT260_ALERT_2_C | Large Average Ueq of Residue Including           | Cl1   |       |   | 0.217 Check |
| PLAT341_ALERT_3_C | Low Bond Precision on C-C Bonds .....            |       |       |   | 0.0096 Ang. |
| PLAT906_ALERT_3_C | Large K Value in the Analysis of Variance .....  |       |       |   | 2.802 Check |
| PLAT911_ALERT_3_C | Missing FCF Refl Between Thmin & STh/L=          | 0.595 |       |   | 9 Report    |
| PLAT978_ALERT_2_C | Number C-C Bonds with Positive Residual Density. |       |       |   | 0 Info      |

---

**Alert level G**

|                   |                                                  |                |   |  |              |
|-------------------|--------------------------------------------------|----------------|---|--|--------------|
| PLAT003_ALERT_2_G | Number of Uiso or Uij Restrained non-H Atoms ... |                |   |  | 2 Report     |
| PLAT083_ALERT_2_G | SHELXL Second Parameter in WGHT Unusually Large  |                |   |  | 5.15 Why ?   |
| PLAT178_ALERT_4_G | The CIF-Embedded .res File Contains SIMU Records |                |   |  | 1 Report     |
| PLAT232_ALERT_2_G | Hirshfeld Test Diff (M-X) Cul                    | --N1           | . |  | 5.7 s.u.     |
| PLAT244_ALERT_4_G | Low 'Solvent' Ueq as Compared to Neighbors of    | P3             |   |  | Check        |
| PLAT300_ALERT_4_G | Atom Site Occupancy of F6                        | Constrained at |   |  | 0.5 Check    |
| PLAT300_ALERT_4_G | Atom Site Occupancy of F6A                       | Constrained at |   |  | 0.5 Check    |
| PLAT301_ALERT_3_G | Main Residue Disorder .....                      | (Resd 1 )      |   |  | 2% Note      |
| PLAT302_ALERT_4_G | Anion/Solvent/Minor-Residue Disorder (Resd 2 )   |                |   |  | 14% Note     |
| PLAT398_ALERT_2_G | Deviating C-O-C Angle From 120 for O1            |                |   |  | 103.9 Degree |
| PLAT860_ALERT_3_G | Number of Least-Squares Restraints .....         |                |   |  | 6 Note       |
| PLAT883_ALERT_1_G | No Info/Value for _atom_sites_solution_primary . |                |   |  | Please Do !  |
| PLAT909_ALERT_3_G | Percentage of I>2sig(I) Data at Theta(Max) Still |                |   |  | 31% Note     |

---

0 **ALERT level A** = Most likely a serious problem - resolve or explain  
0 **ALERT level B** = A potentially serious problem, consider carefully  
19 **ALERT level C** = Check. Ensure it is not caused by an omission or oversight  
13 **ALERT level G** = General information/check it is not something unexpected

1 ALERT type 1 CIF construction/syntax error, inconsistent or missing data  
14 ALERT type 2 Indicator that the structure model may be wrong or deficient  
6 ALERT type 3 Indicator that the structure quality may be low  
11 ALERT type 4 Improvement, methodology, query or suggestion  
0 ALERT type 5 Informative message, check

---

---

It is advisable to attempt to resolve as many as possible of the alerts in all categories. Often the minor alerts point to easily fixed oversights, errors and omissions in your CIF or refinement strategy, so attention to these fine details can be worthwhile. In order to resolve some of the more serious problems it may be necessary to carry out additional measurements or structure refinements. However, the purpose of your study may justify the reported deviations and the more serious of these should normally be commented upon in the discussion or experimental section of a paper or in the "special\_details" fields of the CIF. checkCIF was carefully designed to identify outliers and unusual parameters, but every test has its limitations and alerts that are not important in a particular case may appear. Conversely, the absence of alerts does not guarantee there are no aspects of the results needing attention. It is up to the individual to critically assess their own results and, if necessary, seek expert advice.

### **Publication of your CIF in IUCr journals**

A basic structural check has been run on your CIF. These basic checks will be run on all CIFs submitted for publication in IUCr journals (*Acta Crystallographica*, *Journal of Applied Crystallography*, *Journal of Synchrotron Radiation*); however, if you intend to submit to *Acta Crystallographica Section C* or *E* or *IUCrData*, you should make sure that full publication checks are run on the final version of your CIF prior to submission.

### **Publication of your CIF in other journals**

Please refer to the *Notes for Authors* of the relevant journal for any special instructions relating to CIF submission.

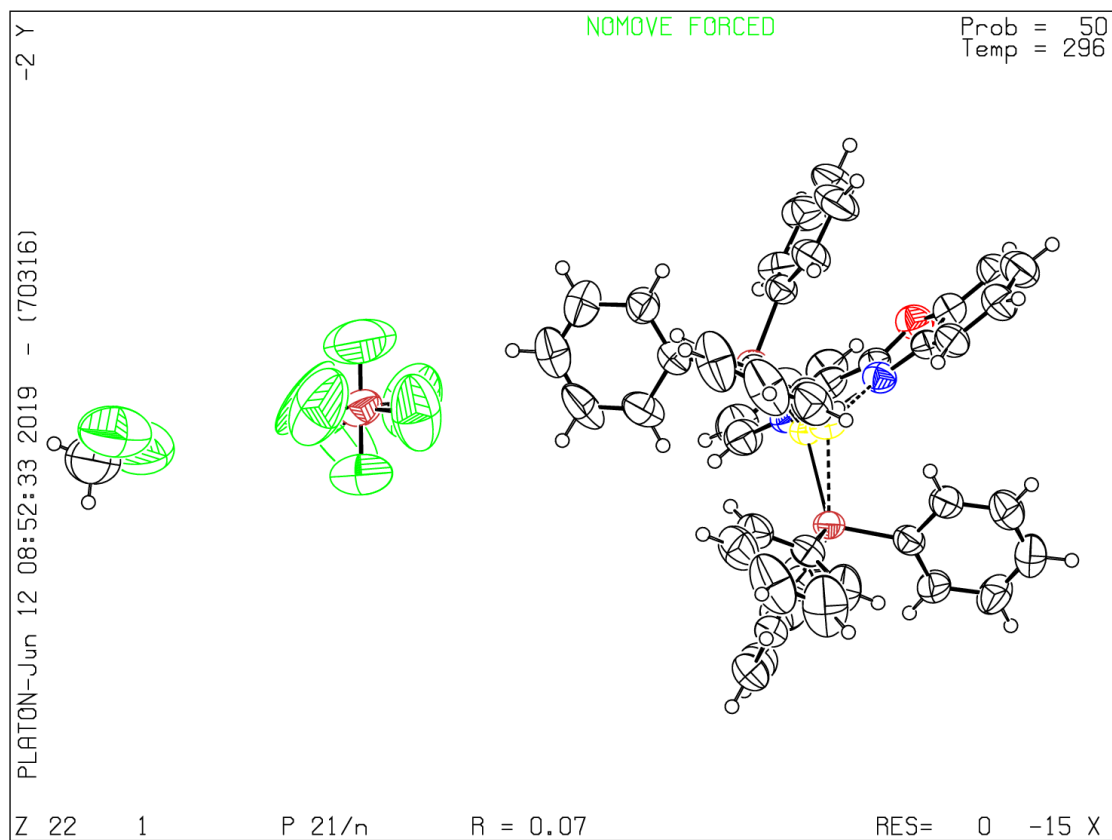

Supplement: Supplementary file 1 [file 1 › checkcif-Complex 1-CCDC-1848398[AU] (2).pdf]
