# Supplementary material
Source: publisher figshare collection journal article supplement (https://tandf.figshare.com/articles/dataset/_/9963524)
Supplement: Supplementary file 1 [file 1]

Archive with 2 entries (2 files):
- checkcif-Complex 1-CCDC-1848398[AU] (2).pdf
- checkcif-Complex 2-CCDC-1848399[AU] (2).pdf
